# Supplementary material for: Facile template synthesis of dumbbell-like Mn2O3 with oxygen vacancies for efficient degradation of organic pollutants by activating peroxymonosulfate
Source: Royal Society of Chemistry journal article supplement (doi:10.1039/c9cy01849b), 2020-01-01
Supplement: c9cy01849b1.pdf [file c9cy01849b1.pdf]

**Facile template synthesis of dumbbell-like Mn<sub>2</sub>O<sub>3</sub> with oxygen vacancies for efficient degradation of organic pollutants by activating peroxymonosulfate**

Yang Li <sup>a</sup>, Didi Li <sup>a</sup>, Shisuo Fan <sup>b</sup>, Ting Yang <sup>c</sup>, Qi Zhou <sup>d, \*</sup>

<sup>a</sup> Guangzhou Key Laboratory of Environmental Catalysis and Pollution Control, School of Environmental Science and Engineering, Institute of Environmental Health and Pollution Control, Guangdong University of Technology, Guangzhou 510006, China

<sup>b</sup> School of Resources and Environment, Anhui Agricultural University, Hefei 230036, China

<sup>c</sup> College of Life and Environmental Sciences, Minzu University of China, Beijing 100081, China

<sup>d</sup> College of chemistry and chemical engineering, Anhui University, Hefei 230601, China

\* Corresponding author: TEL/FAX: +86-0551-63861279; E-mail: [roundzking@163.com](mailto:roundzking@163.com)

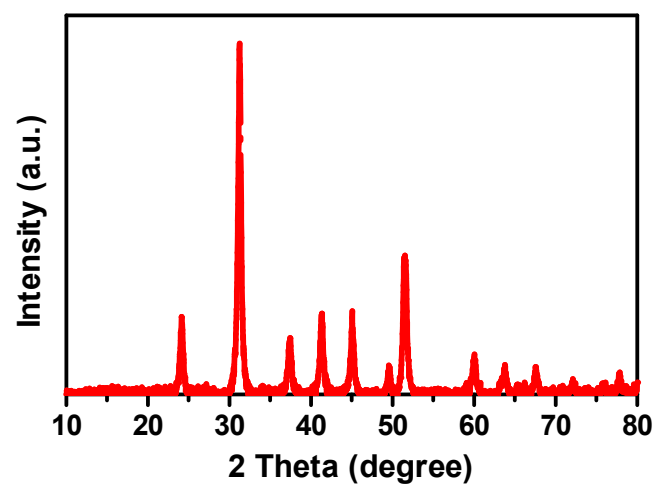

**Fig. S1.** XRD pattern of the precursors of  $\text{Mn}_2\text{O}_3\text{-G}$ .

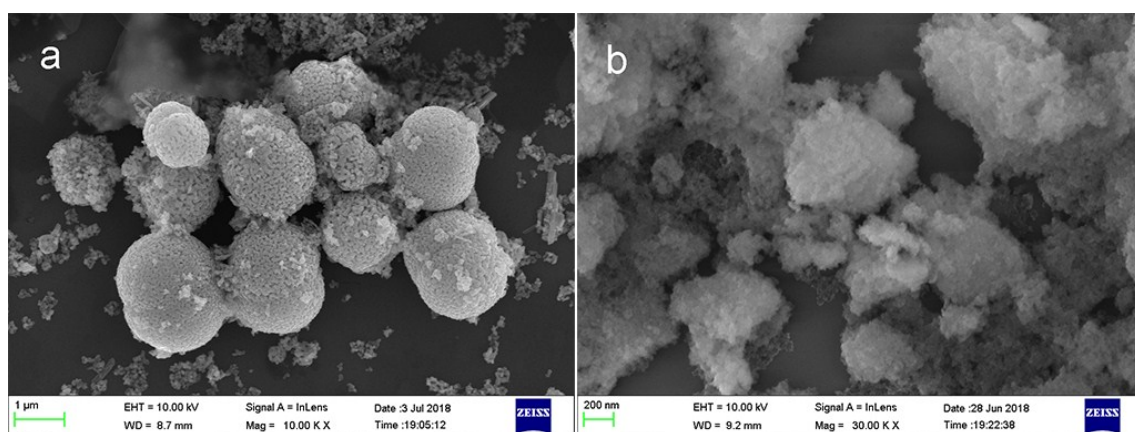

**Fig. S2.** FESEM images of (a) Mn<sub>2</sub>O<sub>3</sub>-C and (b) Mn<sub>2</sub>O<sub>3</sub>-N.

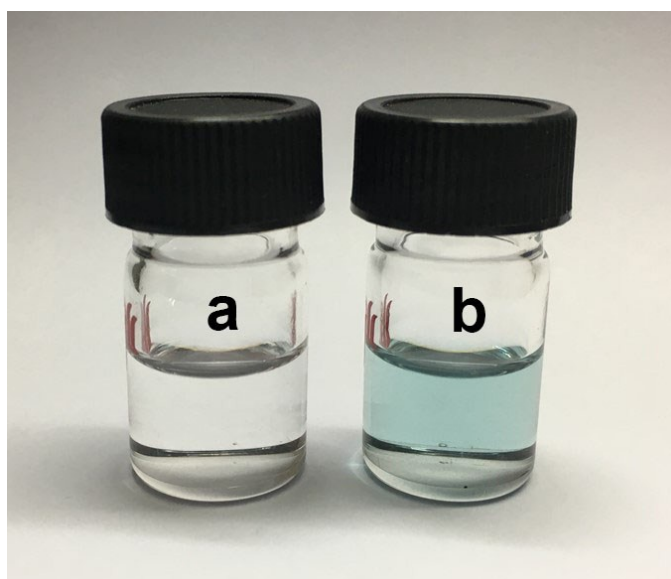

**Fig. S3.** The optical image of the solution in the (a) NBT and (b)  $\text{Mn}_2\text{O}_3\text{-G/PMS/NBT}$  system.

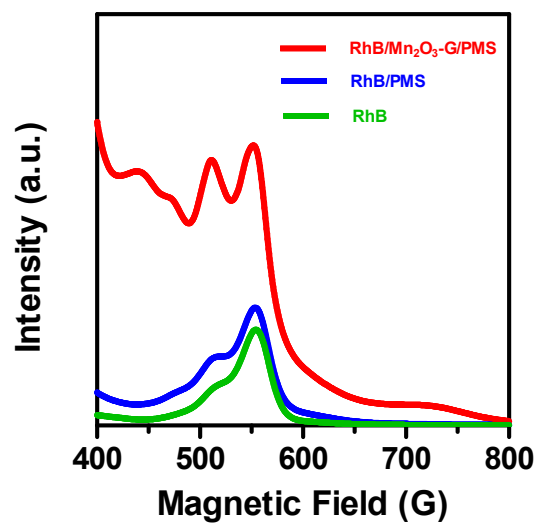

**Fig. S4.** UV-vis absorption spectra of  $\text{H}_2\text{O}_2$  concentration in different systems.
